# Supplementary material
Source: PubMed Central journal article supplement (PMC3568543)

1 Supplementary material:

2 Fig. S1: Presence of autofluorescence and concordance with Nile Red stain: S1A:

3 Autofluorescence, *M. fortuitum* 24 hours incubation; S1B: Nile Red, *M. fortuitum* 24

4 hours incubation; S1C and S1D: Extracellular autofluorescence and Nile Red stain at 24

5 hours in *M. abscessus* and *M. chelonae* respectively.

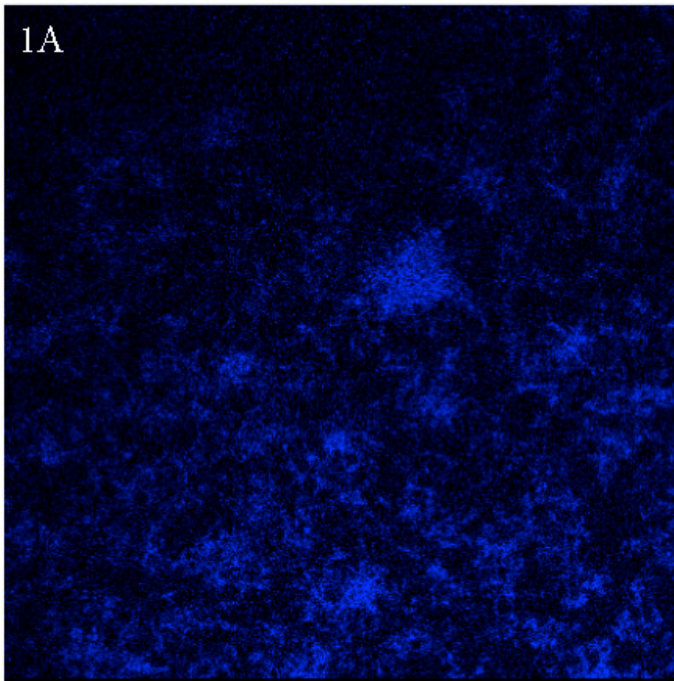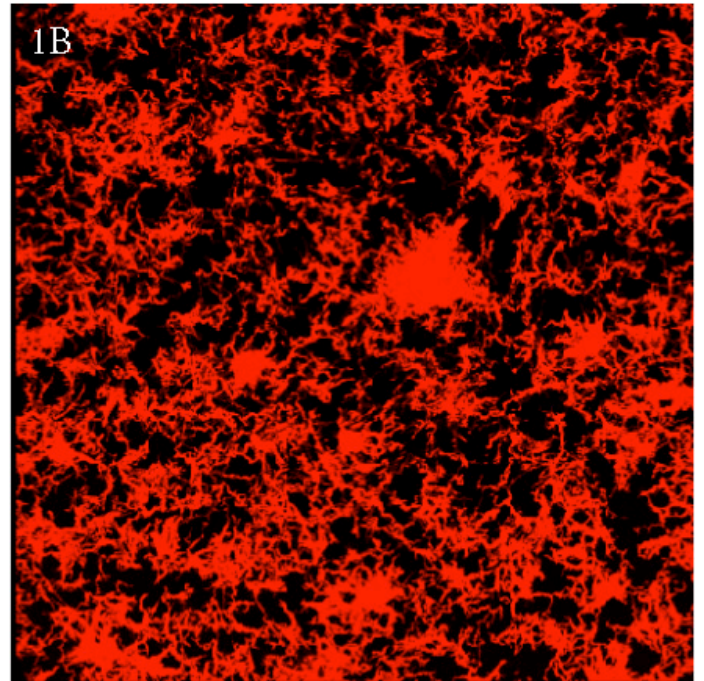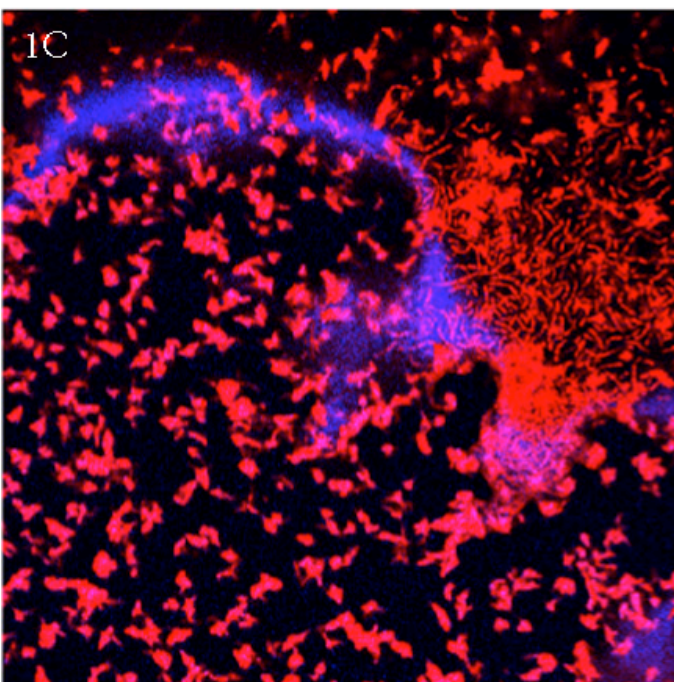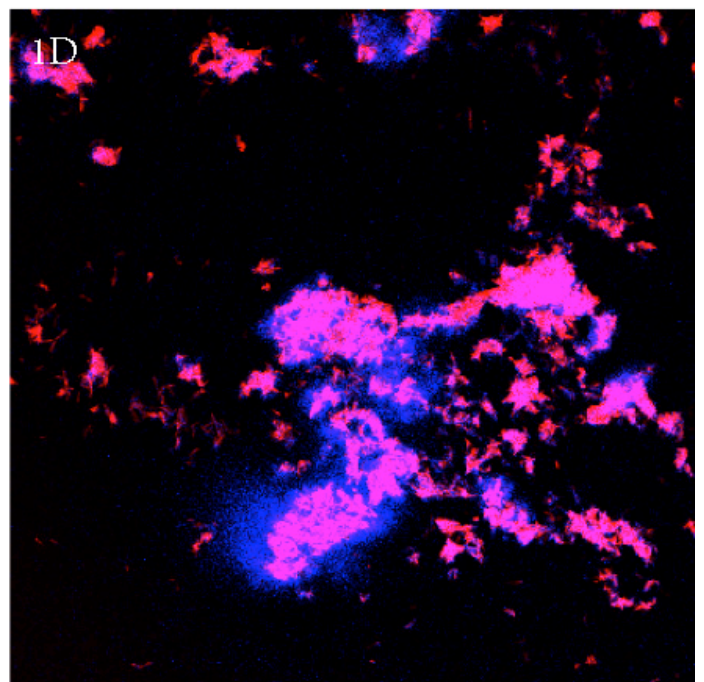

6 Fig S2: 3D reconstructions of the confocal images (48 hours). S2A: *M. abscessus*  
7 biofilm (Backlight stain); S2B: *M. chelonae* biofilm (Backlight stain); S2C: *M.*  
8 *fortuitum* biofilm (Nile Red stain and autofluorescence). S2A and S2B reconstructions  
9 were performed with Leica SP5 software. S2C reconstruction was performed with  
10 ImageJ Software.

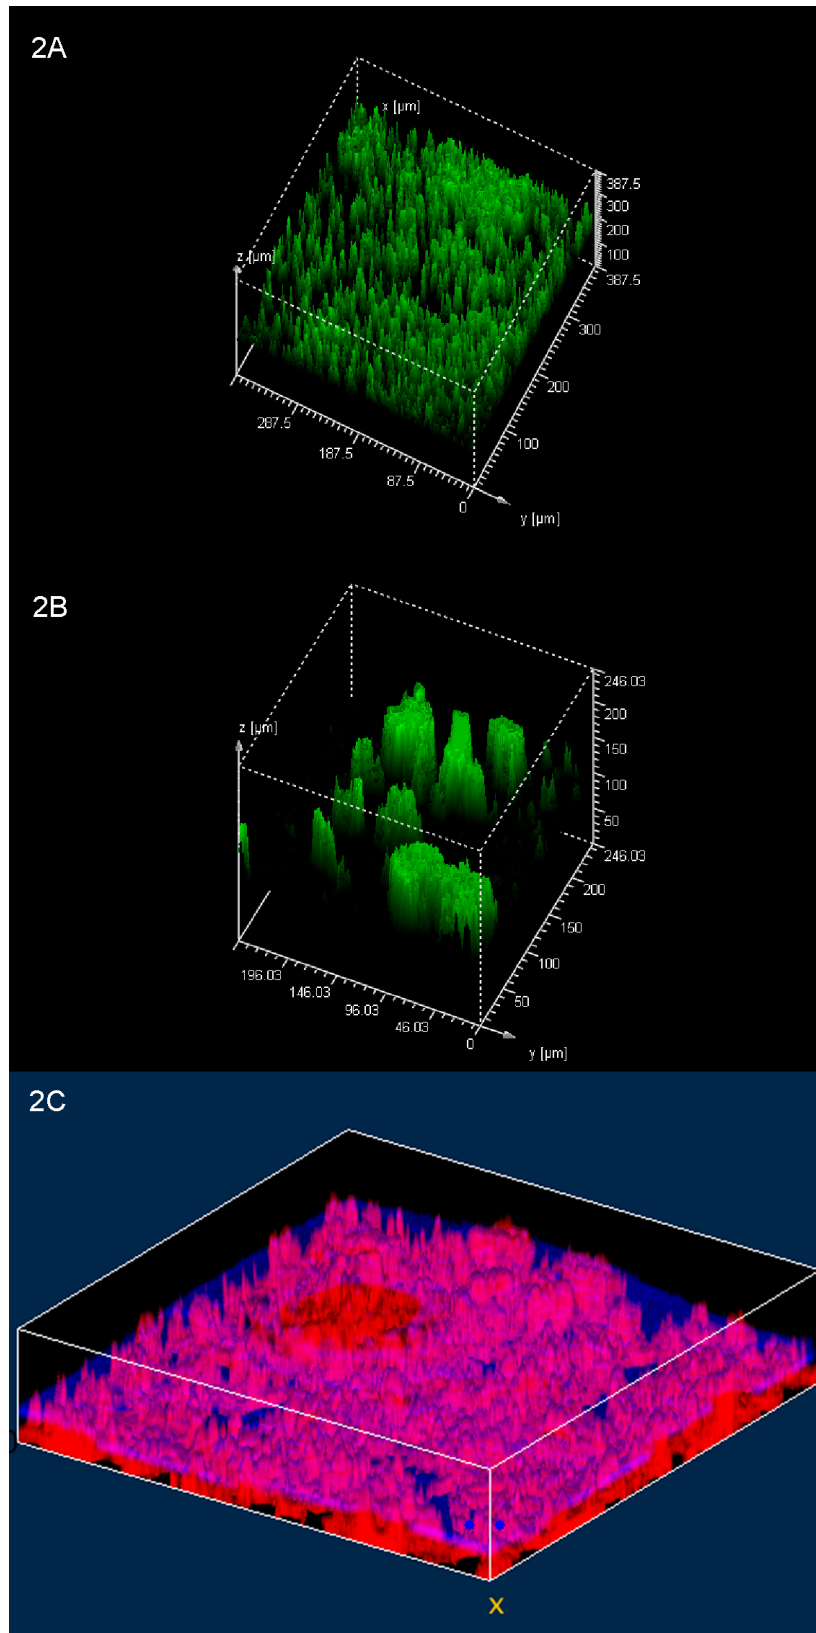

Supplement: AEM.03149-12_zam999104087so1.pdf [file AEM.03149-12_zam999104087so1.pdf]
